# Supplementary material for: Siccanin-related drimane meroterpenoids: biological activities and synthesis
Source: Royal Society of Chemistry journal article supplement (doi:10.1039/d4np00025k), 2024-11-04
Supplement: d4np00025k1.xlsx [file d4np00025k1.xlsx]

## Sheet: Sheet1
Numb.	Name	Smiles
1	siccanin	[H][C@]12C(C)(C)CCC[C@@]13C4[C@](OC(C=C(C)C=C5O)=C5[C@@H]4OC3)(C)CC2
2	tauranin	CC1(C)CCC[C@@]2(C)[C@@]1([H])CCC([C@@H]2CC(C(C=C3CO)=O)=C(O)C3=O)=C
3	3-Ketotauranin	CC1(C)C(CC[C@@]2(C)[C@@]1([H])CCC([C@@H]2CC3=C(O)C(C(CO)=CC3=O)=O)=C)=O
4	3α-hydroxytauranin	CC1(C)[C@H](O)CC[C@@]2(C)[C@@]1([H])CCC([C@@H]2CC3=C(O)C(C(CO)=CC3=O)=O)=C
5	12-hydroxytauranin	C[C@]1(CO)CCC[C@@]2(C)[C@@]1([H])CCC([C@@H]2CC3=C(O)C(C(CO)=CC3=O)=O)=C
6	zonarol	CC1(C)CCC[C@]([C@@]1([H])CCC2=C)(C)[C@H]2CC3=CC(O)=CC=C3O
7	No name	CC1(C)CCC[C@]2(C)[C@]1([H])CCC([C@H]2CC3=CC(O)=CC=C3OC)=C
8	zonaroic acid	CC1(C)CCC[C@]2(C)[C@]1([H])CCC([C@H]2CC3=C(O)C=CC(C(O)=O)=C3)=C
9	zonarone	CC1(C)CCC[C@@]([C@]1([H])CC2)(C)[C@H](CC3=CC(C=CC3=O)=O)C2=C
10	hyatellaquinone	CC1(C)CCC[C@]2(C)[C@]1([H])CCC([C@H]2CC3=C(O)C(C=C(OC)C3=O)=O)=C
11	peyssonol A	CC1(C)[C@@H](Br)CC[C@@]2(C)[C@]1([H])CCC([C@H]2CC3=CC(O)=C(C=O)C=C3O)=C
12	F-12509A	CC1(C)CCC[C@@]2(C)[C@@]1([H])CCC([C@@H]2CC(C(C(O)=C3)=O)=C(O)C3=O)=C
13	purpurogemutantin	CC1(C)CCC[C@@]2(C)[C@@]1([H])CCC([C@@H]2C[C@]3(O)CC(C(CO)=CC3=O)=O)=C
14	purpurogemutantidin	C[C@]1([C@H]2CC3(O)C(C=C(C(C3)=O)CO)=O)CCCC(C)(C)[C@]1([H])CCC2=C
15	penicilliumin A	CC1(C)CCC[C@@]2(C)[C@@]1([H])CCC([C@@H]2C[C@@]3(O4)[C@H]4[C@H](O)C(CO)=CC3=O)=C
16	macrophorin A	CC([C@@](CCC([C@@H]1C[C@@]2(O3)[C@H]3[C@H](O)C(CO)=CC2=O)=C)([H])[C@]1(C)CC4)(C)C4=O
17	macrophorin B	CC1(C)[C@@H](O)CC[C@@]2(C)[C@@]1([H])CCC([C@@H]2C[C@@]3(O4)[C@H]4[C@H](O)C(CO)=CC3=O)=C
18	macrophorin C	[H][C@]1(CC2)C(C)(C)CCC[C@]1(C)[C@@H](C[C@@]3(O4)[C@H]4[C@H](O)C(COC(C[C@](O)(C)CC(O)=O)=O)=CC3=O)C2=C
19	macrophorin D	CC1(C)CCC[C@@]2(C)[C@@]1([H])CCC([C@@H]2C[C@@]3(O4)[C@H]4[C@H](O)C(COC(CC(O)=O)=O)=CC3=O)=C
20	macrophorin E	CC1(C)CCC[C@@]2(C)[C@@]1([H])CCC([C@@H]2C[C@@]3(O)CC(C(COC(CC(O)=O)=O)=CC3=O)=O)=C
21	macrophorin F	CC1(C)CCC[C@@]2(C)[C@@]1([H])CCC([C@@H]2C[C@@]3(O4)[C@H]4[C@H](OC(CC(O)=O)=O)C(CO)=CC3=O)=C
22	macrophorin G	[H][C@]1(CC2)C(C)(C)CCC[C@]1(C)[C@@H](C[C@@]3(O4)[C@H]4C(C(COC(C[C@@](C)(O)CC(O)=O)=O)=CC3=O)=O)C2=C
23	4'-oxomacrophorin D	[H][C@]1(CC2)C(C)(C)CCC[C@]1(C)[C@@H](C[C@@]3(O4)[C@H]4C(C(CO)=CC3=O)=O)C2=C
24	4'-oxomacrophorin A	[H][C@]1(CC2)[C@@](CO)(C)CCC[C@]1(C)[C@@H](C[C@@]3(O4)[C@H]4C([C@@]5(CO)[C@H](O5)C3=O)=O)C2=C
25	2',3'-epoxy-13-hydroxy-4'-oxomacrophorin A	[H][C@]1(CC2)C(C)(C)[C@H](O)CC[C@]1(C)[C@@H](C[C@]3(O4)[C@@H]4C(C(COC([C@H](O)[C@@H](O)C)=O)=CC3=O)=O)C2=C
26	neomacrophorin I	C[C@@]12[C@](CCC([C@@H]2C[C@]3(O4)[C@@H]4[C@@](O)([H])C(COC([C@H](O)[C@@H](O)C)=O)=CC3=O)=C)([H])C(C)(C)[C@H](O)CC1
27	neomacrophorin II	C[C@@]12[C@](CCC([C@@H]2C[C@]3(O4)[C@@H]4[C@@](O)([H])C(COC(C[C@@H](O)C)=O)=CC3=O)=C)([H])C(C)(C)[C@H](O)CC1
28	neomacrophorin III	[H][C@]1(CC2)C(C)(C)[C@H](O)CC[C@]1(C)[C@@H](C[C@]3(O4)[C@@H]4C(C(COC(C[C@@H](O)C)=O)=CC3=O)=O)C2=C
29	neomacrophorin IV	[H][C@]1(CC2)C(C)(C)[C@H](O)CC[C@]1(C)[C@@H](C[C@]3(O4)[C@@H]4[C@]([H])(O)C(CO)=CC3=O)C2=C
30	neomacrophorin V	[H][C@]1(CC2)C(C)(C)[C@H](O)CC[C@]1(C)[C@@H](C[C@]3(O4)[C@@H]4C(C(CO)=CC3=O)=O)C2=C
31	neomacrophorins VI	C[C@@]1(CO)CCC[C@@]2(C)[C@@]1([H])CCC([C@@H]2C[C@@]3(O4)[C@H]4[C@@H](O)C(CO)=C(Cl)C3=O)=C
32	myrothecol A	C[C@@]1(CO)CCC[C@@]2(C)[C@@]1([H])CCC([C@@H]2C[C@]34[C@@H](O4)[C@H](O)C(CO)=CC3=O)=C
33	myrothecol B	C[C@@]1(COC(C)=O)CCC[C@@]2(C)[C@@]1([H])CCC([C@@H]2C[C@]34[C@@H](O4)[C@H](O)C(CO)=CC3=O)=C
34	myrothecol C	C[C@@]1(CO)CCC[C@@]2(C)[C@@]1([H])CCC([C@@H]2C[C@@]3(O4)[C@H]4[C@@H](O)C(CO)=CC3=O)=C
35	myrothecol D	C[C@@]1(COC(C)=O)CCC[C@@]2(C)[C@@]1([H])CCC([C@@H]2C[C@@]3(O4)[C@H]4[C@@H](O)C(CO)=CC3=O)=C
36	myrothecol E	C[C@@]1(CO)CCC[C@@]2(C)[C@@]1([H])CCC([C@@H]2CC([C@H](O)[C@@H](O)[C@@]3(O)CO)=C(O)C3=O)=C
37	myrothecol F	C[C@@]1(CO)CCC[C@@]2(C)[C@@]1([H])CCC([C@@H]2C[C@]3(O)CC(C(CO)=CC3=O)=O)=C
38	myrothecol G	C[C@@]1(CO)CCC[C@@]2(C)[C@@]1([H])CCC([C@@H]2C[C@@]3(O)CC(C(CO)=CC3=O)=O)=C
39	myrothecol H	C[C@]12[C@@](CCC([C@H]2C[C@@]34[C@H](O4)[C@H](O)C(C)=CC3=O)=C)([H])C(C)(C)CCC1
40	nitrosporeunol G	CC1(C)CCC[C@]([C@@]1([H])CC=C2C)(C)[C@H]2CC3=CC(O)=CC=C3O
41	isozonarol	CC1(C)CCC[C@@]2(C)[C@H](CC3=CC(C=CC3=O)=O)C(C)=CC[C@@]21[H]
42	isozonarone	CC1(C)CCC[C@@]2(C)[C@@]1([H])CC=C(C)[C@@H]2CC3=C(O)C(OC(C)=O)=CC=C3O
43	20-O-acetyl-21-hydroxy- ent-isozonarol	C[C@@]12[C@](CC=C(C)[C@@H]2CC(C(C=C3)=O)=C(O)C3=O)([H])C(C)(C)CCC1
44	21-hydroxy-ent-isozonarone	CC1(C)CCC[C@@]2(C)C1CC=C(C)[C@@H]2CC3=CC(O)=C(O)C(C=O)=C3OS(=O)(O[Na])=O
45	siphonodictyal C	CC1(C)CCC[C@@]2(C)[C@@]1([H])CC=C(C)[C@@H]2CC3=C(O)C(O)=CC(OS(S[Na])=S)=C3O
46	siphonodictyol I	CC1(C)CCC[C@@]2(C)C1CC=C(C)[C@@H]2CC3=CC(C(OC)=O)=CC(O)=C3O
47	peyssonoic acid A	OC[C@](CCC[C@@]1([C@H]2C[C@@]34O[C@@H]3C(C(CO)=C[C@H]4O)=O)C)([C@@]1(CC=C2C)[H])C
48	isohyatellaquinone	CC1(C)[C@@H](Br)CC[C@@]2(C)[C@@]1([H])CC=C(C)[C@H]2CC3=CC(O)=C(CC(O)=O)C=C3O
49	epoxyphomalin A	CC(C([C@H]1O[C@]12C[C@H]3C(C)=CC[C@]4([C@@](C)(CCC[C@]34C)CO)[H])=O)=C[C@H]2O
50	epoxyphomalin B	[H][C@]1(CC=C2C)[C@@](CCC[C@]([C@H]2C[C@@]34O[C@@H]3[C@@H](C([C@@H]([C@@H]4O)O)=C)O)1C)(C(O)=O)C
51	epoxyphomalin C	C=C([C@@H]1O)[C@H]([C@H]2O[C@@]2(C[C@H]3C(C)=CC[C@]4(C(C)(CCC[C@]34C)C)[H])[C@H]1O)O
52	epoxyphomalin D	CC(C([C@H]1O[C@]12C[C@H]3C(C)=CC[C@]4([C@@](CCC[C@]34C)(C(O)=O)C)[H])O)=CC2O
53	epoxyphomalin E	CC1(C)CCC[C@]([C@@]1([H])CC=C2C)(C)[C@H]2C[C@@]3(O4)[C@H]4[C@H](O)C(CO)=C[C@H]3O
54	craterellin A	CC1(C)[C@@H](O)CC[C@]([C@@]1([H])CC=C2C)(C)[C@H]2C[C@@]3(O4)[C@H]4[C@H](O)C(CO)=C[C@H]3O
55	craterellin B	CC1(C)CCC[C@]([C@@]1([H])CC=C2C)(C)[C@H]2C[C@@]3(O4)[C@H]4[C@H](O)C([C@H](O)[C@H]3O)=C
56	craterellin C	CC1(C)[C@@H](O)CC[C@]([C@@]1([H])CC=C2C)(C)[C@H]2C[C@@]3(O4)[C@H]4[C@H](O)C([C@H](O)[C@H]3O)=C
57	craterellin D	CC1(C)CCC[C@]2(C)[C@]1([H])CC[C@](C)(O)[C@H]2CC3=CC(O)=CC=C3O
58	smenodiol	CC1(C)CCC[C@@]2(C)[C@@]1([H])CC=C(C)[C@@H]2CC3=CC(C(OC)=O)=CC=C3O
59	dactylosponol	CC1(C)CCC[C@@]2(C)[C@@]1([H])CC=C(C)[C@@H]2CC3=CC(C(OC)=O)=C(O)C(O)=C3O
60	dactylospontriol	CC1(C)CCC[C@]2(C)[C@]1([H])CC=C(C)[C@H]2CC3=C(O)C(C=C(OC)C3=O)=O
61	yahazunol	CC1(C)CCC[C@@]2(C)[C@@]1([H])CC[C@@](C)(O)[C@@H]2CC3=CC(O)=CC=C3O
62	ent-yahazunol	CC1(C)CCC[C@@]2(C)C1CC[C@](O)(C)[C@@H]2CC3=C(O)C=CC(O)=C3C=O
63	siphonodictyal A	CC1(C)CCC[C@@]2(C)[C@@]1([H])CC[C@@](C)(O)[C@@H]2CC3=C(O)C=C(C)C=C3O
64	albaconol	CC1(C)CCC[C@@]2(C)[C@@]1([H])CC[C@@](C)(O)[C@@H]2CC3=C(C)C=C(O)C=C3O
65	neoalbaconol	CC1(C)CCC[C@@]2(C)[C@@]1([H])CC[C@@](C)(O)[C@@H]2CC3=C(O)C=CC(C(O)=O)=C3
66	dictyvaric acid	CC1(C)CCC[C@@]2(C)[C@@]1([H])CC[C@@](C)(O)[C@@H]2CC3=C(C=O)C(O)=CC=C3OS(=O)(O[Na])=O
67	siphonodictyal A sulfate	CC1(C)CCC[C@@]2(C)[C@@]1([H])CC[C@@](C)(O)[C@@H]2CC3=CC(C(OC)=O)=CC=C3O
68	dysidphenol C	OC1=C(OC)C=C(C(OC)=O)C=C1C[C@H]2[C@](C)(O)CC[C@@]3([H])C(C)(C)CCC[C@@]32C
69	hippomeroterpene B	CC1(C)CCC[C@@]2(C)[C@@]1([H])CC[C@@](C)(O)[C@@H]2CC3=CC(C(OC)=O)=CC(O)=C3O
70	xishaeleganin B	CC1(C)CCCC2(C)C1CCC(C)(OCCCCCC)C2C(C3=CC=CC(O)=C3)OC
71	13-[[2-(hexyloxy)-2,5,5,8a-tetramethyldecahydro -1-naphthalenyl] (methoxy) methyl]benzenol	OC1=C(OS(=O)(O[Na])=O)C(CC2=C(C)CC[C@@]3([H])C(C)(C)CCC[C@@]32C)=CC(CO)=C1
72	siphonodictyol H	C[C@@]12[C@](CCC(C)=C2CC3=C(O)C(O)=CC=C3OC)([H])C(C)(C)CCC1
73	wiedendiol A	CC12C(CC(C(C)=C2CC3=CC(O)=CC=C3O)=O)C(C)(C)CCC1
74	zonarenone	O=C(C(/C=C1[C@@]2(C)CCCC(C)(C)[C@]2([H])CC[C@@H]/1C)=C3O)C(OC)=CC3=O
75	spongiaquinone	CC1(C)CCC[C@@]2(C)[C@@]1([H])CC[C@@H](C)/C2=C\C3=CC(O)=C(O)C(C=O)=C3O
76	wiedendiol B	C[C@@]12[C@](CC[C@H](C)/C2=C\C3=CC(C=C(OC)C3=O)=O)([H])C(C)(C)CCC1
77	deoxyspongiaquinol	CC1(C)CCC[C@@]2(C)[C@@]1([H])CC[C@H](C)/C2=C(Cl)/C3=C(O)C(OC)=CC(O)=C3
78	deoxyspongiaquinone	CC1(C)CCC[C@@]2(C)[C@@]1([H])CC[C@H](C)/C2=C(Cl)/C(C(C(OC)=C3)=O)=CC3=O
79	(E)-chlorodeoxyspongiaquinol	CC1(C)CCC[C@@]2(C)[C@@]1([H])CC[C@H](C)/C2=C\C3=C(OS(=O)(O)=O)C(/C=[NH+]/CCS(=O)(O)=O)=C([O-])C(O)=C3
80	(E)-chlorodeoxyspongiaquinone	C[C@@]12[C@](CC[C@H](C)/C2=C\C3=CC(O)=CC(OC)=C3O)([H])C(C)(C)CCC1
81	siphonodictyal B	C[C@@]12[C@](CC[C@H](C)/C2=C\C3=C(OC)C=CC(O)=C3O)([H])C(C)(C)CCC1
82	siphonodictyal B1	CC1(C)CCC[C@@]2(C)[C@@]1([H])CC[C@H](C)/C2=C\C3=C(OS(=O)(O)=O)C(C=O)=C(O)C(O)=C3
83	siphonodictyal B2	CC1(C)CCC[C@@]2(C)[C@@]1([H])CC[C@H](C)/C2=C\C3=C(OS(=O)(O)=O)C(C=O)=C(O)C(OS(=O)(O)=O)=C3
84	siphonodictyal B3	CC1(C)CCC[C@]2(C)[C@H]3CC4=CC(O)=CC=C4O[C@]3(C)CC[C@]21[H]
85	chromazonarol	CC1(C)CCC[C@@]2(C)[C@H](CC3=CC(O)=CC=C3O4)C4(C)CC[C@@]21[H]
86	ent-chromazonarol	CC1(C)CCC[C@@]2(C)C1CC[C@@]3(C)[C@@H]2CC4=C(C=CC(O)=C4)O3
87	8-epichromazonarol	O=C(C1=C2OC3(C)C([C@@]4(C)CCCC(C)(C)[C@]4([H])CC3)C1)C(OC)=CC2=O
88	cyclospongiaquinone-1	O=C(C1=C2OC3(C)C([C@@]4(C)CCCC(C)(C)[C@]4([H])CC3)=C1)C(OC)=CC2=O
89	dehydrocyclospongiaquinone-1	CC1(C)CCC[C@@]2(C)[C@@]1([H])CC[C@](C)(O3)[C@@H]2C=C4C3=CC(C(O)=C4)=O
90	puupehenone	CC1(C)CCC[C@@]2(C)[C@@]1([H])CC[C@@]3(C)[C@@]2(C(C#N)=C4C(O3)=CC(C(O)=C4)=O)[H]
91	cyanopuupehenone	CC1(C)CCC[C@@]2(C)[C@@]1([H])CC[C@@]3(C)[C@@]2(C=C4C(O3)=CC(C(O)=C4Cl)=O)[H]
92	21-Chloropuupehenone	CC1(C)CCC[C@@]2(C)[C@@]1([H])CC[C@@]3(C)C2=CC(C(O3)=CC4=O)=CC4=O
93	puupehedione	CC1(C)CCC[C@@]2(C)[C@@]1([H])CC[C@@](O3)(C)[C@]2([H])C=C4C3=CC(C(OC)=C4)=O
94	15-cyanopuupehenol	CC1(C)CCC[C@@]2(C)[C@@]1([H])CC[C@@]3(C)C2=CC4=C(Cl)C(O)=C(O)C=C4O3
95	21-chloropuupehenol	CC1(C)CCC[C@@]2(C)[C@@]1([H])CC[C@@](OC3=CC(O)=C(O)C=C34)(C)[C@]2([H])C4=O
96	15-oxopuupehenol	CC1(C)CCC[C@@]2(C)[C@@]1([H])CC[C@@]3(C)[C@@H]2[C@H](OC)C4=C(C=C(O)C(O)=C4)O3
97	15α-methoxypuupehenol	CC1(C)CCC[C@@]2(C)[C@@]1([H])CC[C@@]3(C)C2=CC4=CC(OC)=C(O)C=C4O3
98	20-methoxy puupehenone	CC1(C)CCC[C@@]2(C)[C@@]1([H])CC[C@]3(C)[C@@]2([C@]([H])(C#N)C4=CC(O)=C(O)C=C4O3)[H]
99	20-methoxy-9,15-ene-puupehenol	CC1(C)CCC[C@@]2(C)[C@@]1([H])CC[C@@]3(C)[C@]2([H])[C@H](OC)C4=C(C=C(O)C(OC)=C4)O3
100	15, 20-dimethoxypuupehenol	CC1(C)CCC[C@@]2(C)[C@@]1([H])CC[C@@](O3)(C)[C@@H]2C=C4C3=CC([C@H](O)[C@@H]4O)=O
101	puupehanol	CC1(C)CCC[C@@]2(C)[C@@]1([H])CC[C@@]3(C)[C@@H]2[C@H](O)C4=CC(O)=C(O)C=C4O3
102	puupehenol	CC1(C)CCC[C@@]2(C)[C@@]1([H])CC[C@@]3(C)C2=CC4=CC(O)=C(OC)C=C4O3
103	19-methoxy-9,15-ene-puupehenol	CC1(C)CCC[C@@]2(C)[C@@]1([H])CC[C@@]3(C)[C@@H]2CC4=C(C(C(CO)=CC4=O)=O)O3
104	BE-40644	CC1(C)[C@@H](OC(C)=O)CC[C@@]2(C)[C@@]1([H])CC[C@@]3(C)[C@@H]2CC4=C(O3)C(C=O)=C(C=O)C=C4O
105	kampanol C	C[C@@]12CC[C@@]3([H])C(C)(C)CCC[C@]3(C)[C@H]1CC4=C(O2)C=C(C)C(C(O)=O)=C4O
106	hongoquercin A	C[C@@]12CC[C@@]3([H])C(C)(C)[C@@H](OC(C)=O)CC[C@]3(C)[C@H]1CC4=C(O2)C=C(C)C(C(O)=O)=C4O
107	hongoquercin B	C/C(C)=C\C(O[C@H]1CC[C@@]2(C)[C@](CC[C@@](O3)(C)[C@]2(O)C=C4C3=CC(C(O)=C4C)=O)([H])C1(C)C)=O
108	UPA0043	CC(O[C@H]1CC[C@@]2(C)[C@](CC[C@@](O3)(C)[C@]2(O)C=C4C3=CC(C(O)=C4C)=O)([H])C1(C)C)=O
109	UPA0044	CC1(C)C(CC[C@@]2(C)[C@@]1([H])CC[C@@]3(C)[C@@H]2CC4=C(C(C=O)=C(C)C=C4O)O3)=O
110	phomoarcherin C	O=C1OCC(C1=C2OC)=C(C)C3=C2C[C@]4([H])[C@@](O3)(C)CC[C@@]5([H])[C@]4(CCC(C5(C)C)=O)C
111	austalide K	O=C1OCC(C1=C2OC)=C(C)C3=C2C[C@]4([H])[C@@](O3)(C)CC[C@@]5(O)[C@]4(CCC(C5(C)C)=O)C
112	austalide L	O[C@H]1CC[C@@]2([C@]3(CC4=C(O[C@@](CC[C@@]2([H])C1(C)C)3C)C(C)=C5COC(C5=C4OC)=O)[H])C
113	austalide V	O=C(C1=C2O)OCC1=C(C3=C2CC([C@]4(C)CCC5=O)[C@](CC[C@]4([H])C5(C)C)(C)O3)C
114	austalide W	O=C(C1=C2OC)OCC1=C(C3=C2CC([C@]4(C)CCC5=O)[C@](C[C@H](O)[C@]4([H])C5(C)C)(C)O3)C
115	17S-dihydroaustalide K	O=C(C1=C2O)OCC1=C(C3=C2CC([C@@]4(C)CCC5=O)C(CCC4C5(C)C)O3)C
116	Kampanol A	OC1=CC(C(O2)OC)=C(C(O[C@]3(CC[C@]4(C(C)5C)[H])C)=C1C[C@@H]3[C@]4(CC[C@@H]5OC(C)=O)C)C2OC
117	Kampanol B	CC1(C)CCC[C@@]2(C)[C@@]1([H])CC[C@@](O3)(C)[C@@H]2C=C4C3=CC([C@](C[C@]([H])(OC)O5)(O)[C@]45[H])=O
118	hyrtenone A	CC1(C)[C@](O)([H])CC[C@@]2(C)[C@@]1([H])CC[C@@]3(C)[C@@H]2CC4=C(C(COC5=O)=C5C=C4O)O3
119	phomoarcherin A	CC1(C)C(CC[C@@]2(C)[C@@]1([H])CC[C@@]3(C)[C@@H]2CC4=C(C(COC5=O)=C5C=C4O)O3)=O
120	phomoarcherin B	CC1(C)C(CC[C@@]2(C)[C@@]1([H])CC[C@@]3(C)C2CC4=C(O3)C=C(O)C5=C4C[C@H](C)OC5=O)=O
121	pentacecilide A	CC1(C)C([C@H](OC(C)=O)C[C@@]2(C)[C@@]1([H])CC[C@@]3(C)C2CC4=C(O3)C=C(O)C5=C4C[C@H](C)OC5=O)=O
122	pentacecilide B	CC1(C)C([C@H](OC(C)=O)C[C@@]2(C)[C@@]1([H])C[C@H](O)[C@@]3(C)C2CC4=C(O3)C=C(O)C5=C4C[C@H](C)OC5=O)=O
123	pentacecilide C	CC1(C)C([C@H](O)C[C@@]2(C)[C@@]1([H])C[C@H](O)[C@@]3(C)C2CC4=C(O3)C=C(O)C5=C4C[C@H](C)OC5=O)=O
124	pentacecilide D	CC1(C)C(C=C[C@@]2(C)[C@@]1([H])C[C@H](O)[C@@]3(C)[C@@]2([H])CC4=C(O3)C=C(O)C5=C4[C@@H](O)[C@@H](C)OC5=O)=O
125	chrodrimanin A	CC1(C)C(C=C[C@@]2(C)[C@@]1([H])C[C@H](O)[C@@]3(C)[C@@]2([H])CC4=C(O3)C=C(O)C5=C4[C@@H](OC(C)=O)[C@@H](C)OC5=O)=O
126	chrodrimanin B	CC1(C)C(CC[C@@]2(C)[C@@]1([H])CC[C@@]3(C)[C@@]2([H])CC4=C(O3)C=C(O)C5=C4C[C@@H](C)OC5=O)=O
127	chrodrimanin C	CC1(C)C(C[C@H](O)[C@@]2(C)[C@@]1([H])C[C@H](O)[C@@]3(C)[C@@]2([H])CC4=C(O3)C=C(O)C5=C4C[C@@H](C)OC5=O)=O
128	chrodrimanin D	CC1(C)C(C=C[C@@]2(C)[C@@]1([H])C[C@H](O)[C@@]3(C)[C@@]2([H])CC4=C(O3)C=C(O)C5=C4C[C@@H](C)OC5=O)=O
129	chrodrimanin E	CC1(C)[C@@H](O)CC[C@@]2(C)[C@@]1([H])C[C@H](O)[C@@]3(C)[C@@]2([H])CC4=C(O3)C=C(O)C5=C4C[C@@H](C)OC5=O
130	chrodrimanin F	CC1(C)C(CC[C@@]2(C)[C@@]1([H])C[C@H](O)[C@@]3(C)[C@@]2([H])CC4=C(O3)C=C(O)C5=C4[C@@H](OC(C)=O)[C@@H](C)OC5=O)=O
131	chrodrimanin G	CC1(C)C(CC[C@@]2(C)[C@@]1([H])C[C@H](O)[C@@]3(C)[C@@]2([H])CC4=C(O3)C=C(O)C5=C4C[C@@H](C)OC5=O)=O
132	chrodrimanin H	CC1(C)C(CC[C@@]2(C)[C@@]1([H])CC[C@@](OC(C=C(O)C3=C4C[C@@H](O)CC3=O)=C4C5)(C)[C@]25[H])=O
133	chrodrimanin I	CC1(C)C(C=C[C@@]2(C)[C@@]1([H])CC[C@@](OC(C=C(O)C3=C4C[C@@H](O)CC3=O)=C4C5)(C)[C@]25[H])=O
134	chrodrimanin J	CC1(C)C(CC[C@@]2(C)[C@@]1([H])C[C@H](O)[C@@]3(C)[C@H]2CC4=C(O3)C(Cl)=C(O)C5=C4C[C@@H](C)OC5=O)=O
135	chrodrimanin K	CC1(C)C(C(Cl)C[C@@]2(C)[C@@]1([H])C[C@H](O)[C@@]3(C)[C@H]2CC4=C(O3)C(Cl)=C(O)C5=C4C[C@@H](C)OC5=O)=O
136	chrodrimanin L	CC1(C)[C@@H](O)C[C@H](O)[C@@]2(C)[C@@]1([H])C[C@H](O)[C@@]3(C)[C@H]2CC4=C(O3)C=C(O)C5=C4C[C@@H](C)OC5=O
137	chrodrimanin M	CC1(C)[C@@H](O)CC[C@@]2(C)[C@@]1([H])C[C@H](O)[C@@]3(C)[C@H]2CC4=C(O3)C=C(O)C5=C4[C@@H](OC(C)=O)[C@@H](C)OC5=O
138	chrodrimanin N	CC1(C)[C@@H](O)CC[C@@]2(C)[C@@]1([H])CC[C@@]3(C)[C@H]2CC4=C(O3)C=C(O)C5=C4C[C@@H](C)OC5=O
139	3- hydroxypentacecilide A	CC1(C)C(C(Cl)(Cl)C[C@@]2(C)[C@@]1([H])C[C@H](O)[C@@]3(C)[C@H]2CC4=C(O3)C(Cl)=C(O)C5=C4C[C@@H](C)OC5=O)=O
140	chrodrimanin O	CC1(C)C(C=C[C@@]2(C)[C@@]1([H])C[C@H](O)[C@@]3(C)[C@H]2[C@@H](O)C4=C(O3)C=C(O)C5=C4C[C@@H](C)OC5=O)=O
141	chrodrimanin P	CC1(C)C(C=C[C@@]2(C)[C@@]1([H])CC([C@@]3(C)[C@H]2CC4=C(O3)C=C(O)C5=C4[C@@H](OC(C)=O)[C@@H](C)OC5=O)=O)=O
142	chrodrimanin Q	CC1(C)[C@@H](O)C=C[C@@]2(C)[C@@]1([H])C[C@H](O)[C@@]3(C)[C@H]2CC4=C(O3)C=C(O)C5=C4[C@@H](OC(C)=O)[C@@H](C)OC5=O
143	chrodrimanin R	CC1(C)C(C=C[C@@]2(C)[C@@]1([H])C[C@H](O)[C@@]3(C)[C@H]2CC4=C(O3)C=C(O)C5=C4[C@@H](OC)[C@@H](C)OC5=O)=O
144	chrodrimanin S	CC1(C)[C@@H](OC(C)=O)CC[C@@]2(C)[C@@]1([H])C[C@H](O)[C@@]3(C)[C@H]2CC4=C(O3)C=C(O)C5=C4C[C@@H](C)OC5=O
145	chrodrimanin T, 3-acetyl chrodrimanin F	CC1(C)[C@@H](OC(C)=O)CC[C@@]2(C)[C@@]1([H])CC[C@@]3(C)[C@H]2CC4=C(O3)C=C(O)C5=C4C[C@@H](C)OC5=O
146	3-acetoxypentacecilide A	CC1(C)C(C=C[C@@]2(C)[C@@]1([H])CC[C@@]3(C)[C@@]2([H])CC4=C(O3)C=C(O)C5=C4C[C@@H](C)OC5=O)=O
147	verruculide A	[H][C@]12C(C)(C)CCC[C@]1(C)[C@]3([H])[C@@](C)(OC4=CC(O)=C(O5)C6=C4[C@@]3([H])OC7=C(O)C=C(O8)C([C@@H]5C9[C@]8(C)CC[C@]%10([H])[C@]9(C)CCCC%10(C)C)=C67)CC2
148	isochromazonarol	O=C(C1=C2O[C@]3([C@@H](C)CC[C@]4([H])[C@]3(C)CCCC4(C)C)C1)C(OC)=CC2=O
149	cyclospongiaquinone-2	CC1(C)[C@H](O)[C@H](O)C[C@@]2(C)C1CC[C@@H](C)[C@@]23OC(C(C([H])=O)=C(C([H])=O)C=C4O)=C4C3
150	7,8-dehydrocyclospongiaquinone-2	CC1(C)CCC[C@]2(C)[C@]1([H])CC=C(C)C23CC4=C(O3)C(C=C(OC)C4=O)=O
151	9-epi-7,8-dehydrocyclospongiaquinone-2	[H][C@]12C(C)(C)[C@H](O)CC[C@]1(C)[C@]3(OC(C(C([H])=O)=C(COC4O[C@@H](CO)[C@H](O)[C@H](O)[C@@H]4O)C=C5O)=C5C3)[C@H](C)CC2
152	cyclospongiacatechol	CC1(C)[C@H](O)CC[C@@]2(C)[C@@]1([H])CC[C@@H](C)[C@]2(O3)CC4=C3C(/C=C/C(C)=O)=C(CO)C=C4O
153	stachartin A	CC1(C)CCC[C@@]2(C)[C@@]3(CC4=C(O3)C(O)=CC(C(OC)=O)=C4)[C@@H](C)CC[C@@]21[H]
154	K-76	[H][C@]12C(C)(C)[C@@H](O)CC[C@]1(C)[C@]3(OC(C(C=O)=C(CO)C=C4O)=C4C3)[C@H](C)CC2
155	Factor B	CC1(C)[C@H](O)CC[C@@]2(C)[C@@]1([H])CC[C@@H](C)[C@@]23OC(C(C([H])=O)=C(C([H])=O)C=C4O)=C4C3
156	Factor A	[H][C@]12C(C)(C)[C@@H](O)CC[C@]1(C)[C@]3(OC(C(C(O)=O)=C(CO)C=C4O)=C4C3)[C@H](C)CC2
157	Factor C	[H][C@]12C(C)(C)[C@H](O)CC[C@]1(C)[C@]3(OC(C(C=O)=C(C=O)C=C4O)=C4C3)[C@H](C)[C@@H](O)C2
158	stachybotrydial, Mer-NF5003 F, stachybotrychromene	[H][C@]12C(C)(C)[C@H](O)[C@H](O)C[C@]1(C)[C@]3(OC(C(C=O)=C(CO)C=C4O)=C4C3)[C@H](C)CC2
159	Mer-NF5003 B	[H][C@]12C(C)(C)[C@H](O)CC[C@]1(C)[C@]3(OC(C(C=O)=C(CO)C=C4O)=C4C3)[C@H](C)CC2
160	Mer-NF5003 E	C[C@@]1(CCCC(C)(C)[C@]1([H])CC[C@H]2C)[C@@]32C=C4C=C(O)C(C(C=O)=C4O3)=O
161	stachybotral	CC1(C)CCC[C@]2(C)[C@]1([H])CC=C(C)[C@@]23CC4=C(O3)C(C=C(OC)C4=O)=O
162	corallidictyal A	C[C@@]12[C@@]3(C=C4C=C(O)C(C(C=O)=C4O3)=O)[C@H](C)CC[C@@]1([H])C(C)(C)CCC2
163	corallidictyal B	OC1=CC(C[C@]23[C@H](C)CCC4C(C)(C)CCCC42C)=C(O3)C(C=O)=C1O
164	corallidictyal C	C[C@@]12[C@](CC[C@@H](C)[C@]23CC4=C(O3)C(C=O)=C(O)C(O)=C4)([H])C(C)(C)CCC1
165	corallidictyal D	CC1(C)[C@H](O)CC[C@@]2(C)[C@@]1([H])CC[C@@H](C)[C@]2(O3)CC4=C3C(C=O)=C(C)C=C4O
166	F1839 I	[H][C@]12C(C)(C)[C@@H](O)CC[C@]1(C)[C@]3(OC(C(C=O)=C(C=O)C=C4O)=C4C3)[C@H](C)CC2
167	Sch 65676	[H][C@]12C(C)(C)[C@H](O)CC[C@]1(C)[C@]3(OC(C(C)=C(C=O)C=C4O)=C4C3)[C@H](C)CC2
168	dysidphenol A	CC1(C)CCC[C@]2(C)[C@@]3(CC4=C(O3)C(O)=CC(C(OC)=O)=C4)[C@H](C)CC[C@]21[H]
169	dysidphenol B	[H][C@]12C(C)(C)[C@H](OC(C)=O)CC[C@]1(C)[C@]3(OC(C(C=O)=C(C)C=C4O)=C4C3)[C@H](C)CC2
170	stachybotrylactone acetate	CC1(C)[C@H](O)[C@H](O)C[C@@]2(C)[C@@]1([H])CC[C@@H](C)[C@@]23OC(C(COC4=O)=C4C=C5O)=C5C3
171	2a -Hydroxystachybotrylactone	CC1(C)[C@H](OC(C)=O)[C@H](OC(C)=O)C[C@@]2(C)[C@@]1([H])CC[C@@H](C)[C@@]23OC(C(COC4=O)=C4C=C5O)=C5C3
172	2a-Acetoxystachybotrylactone acetate	[H][C@]12C(C)(C)[C@H](O)CC[C@]1(C)[C@]3(OC(C(COC4=O)=C4C=C5O)=C5C3)[C@H](C)CC2
173	stachybochartin E	CC1(C)[C@H](OC(C)=O)[C@H](O)C[C@@]2(C)[C@@]1([H])CC[C@@H](C)[C@]2(O3)CC4=C3C(C(OC5)=O)=C5C=C4O
174	stachartin B , stachybotrylactone B	C[C@H]1[C@@]2([C@@]3(C)C[C@@H](O)[C@@H](OC(C)=O)C(C)(C)[C@]3([H])CC1)CC4=C(O2)C(CO5)=C(C=C4O)C5=O
175	stachybotrolide, stachybotrylactone	OC(C1=C2O[C@@]3([C@H](C)CC[C@]4([H])[C@]3(C)CC[C@@H](O)C4(C)C)C1)=CC(CO5)=C2C5=O
176	stachybomycin A	CC1(C)[C@H](O)[C@H](OC(C)=O)C[C@@]2(C)[C@@]1([H])CC[C@@H](C)[C@]2(O3)CC4=C3C(C(OC5)=O)=C5C=C4O
177	stachybomycin B	CC1(C)[C@H](OC(C)=O)[C@H](O)C[C@@]2(C)[C@@]1([H])CC[C@@H](C)[C@]2(O3)CC4=C3C(COC5=O)=C5C=C4O
178	stachybomycin C	CC1(C)CCC[C@@]2(C)[C@@]1([H])CC[C@]3(C)[C@@H]2CC4=C3C(C(OC)=O)=CC(O)=C4O
179	stachybomycin D	[H][C@]12C(C)(C)[C@H](O)CC[C@]1(C)[C@]3(OC(C([C@@H](CC(C)=O)OC4)=C4C=C5O)=C5C3)[C@H](C)CC2
180	stachybotrysin A	[H][C@]12C(C)(C)[C@H](OC(C)=O)CC[C@]1(C)[C@]3(OC(C(C=O)=C(CO)C=C4O)=C4C3)[C@H](C)CC2
181	stachybotrysin B	[H][C@]12C(C)(C)[C@H](OC(C)=O)[C@H](O)C[C@]1(C)[C@]3(OC(C(C=O)=C(CO)C=C4O)=C4C3)[C@H](C)CC2
182	stachybotrysin C	O[C@@H]1CC[C@@]2(C)[C@](CC[C@@H](C)[C@@]23OC(C(C=O)=C(CS(=O)(O)=O)C=C4O)=C4C3)([H])C1(C)C
183	stachybotrysin D	[H][C@]1(CC2)C(C)(C)[C@H](O)CC[C@]1(C)[C@]3(OC(C(C=O)=C(COC(C)=O)C=C4O)=C4C3)C2=C
184	stachybotrysin E	OC1=CC(CO)=C(C=O)C(O2)=C1C[C@@]32[C@H](C)CC[C@@]4([H])C(C)(C)[C@H](OC(C)=O)[C@@H](OC(C)=O)C[C@]34C
185	stachybotrysin F	[H][C@]12C(C)(C)[C@H](O)CC[C@]1(C)[C@]3(OC(C([C@H](CC(C)=O)OC4)=C4C=C5O)=C5C3)[C@H](C)CC2
186	stachybotrysin G	CC1(C)[C@H](OC(C)=O)CC[C@@]2(C)[C@@]1([H])CC[C@@H](C)[C@@]23OC(C(COC4=O)=C4C=C5O)=C5C3
187	stachybotrysin H	CC1(C)[C@H](OC(C)=O)CC[C@@]2(C)[C@@]1([H])CC[C@@H](C)[C@]2(O3)CC4=C3C(C=O)=C(C=O)C=C4O
188	stachybotrydial acetate	CC1(C)[C@H](OC(C)=O)[C@H](OC(C)=O)C[C@@]2(C)[C@@]1([H])CC[C@@H](C)[C@]2(O3)CC4=C3C(C=O)=C(C=O)C=C4O
189	acetoxystachybotrydial acetate	CC1(C)[C@H](OC(C)=O)[C@H](O)C[C@@]2(C)[C@@]1([H])CC[C@H](C)[C@]2(O3)CC4=C3C(C([H])=O)=C(CO)C=C4O
190	stachybonoid D	[H][C@]1(CC2)C(C)(C)[C@H](O)CC[C@]1(C)[C@]3(OC(C(C=O)=C(COC(C)=O)C=C4O)=C4C3)C2=C
191	pelorol	CC1(C)[C@]2([H])CC[C@](C(C(C(OC)=O)=CC(OC)=C3O)=C3C4)(C)C4[C@@]2(C)CCC1
192	pelorol A	CC1(C)CCC[C@@]2(C)[C@@]1([H])CC[C@@]3(C)[C@@H]2CC4=C3C(COC)=CC(O)=C4O
193	akaol A	CC1(C)CCC[C@@]2(C)[C@@]1([H])CC[C@@]3(C)[C@@H]2CC4=C3C(CO)=CC(O)=C4OS(=O)(O[Na])=O
194	akaol B	[H][C@@]1(C(C)(C)[C@H](CC2)O)CC[C@](C)([C@](C([C@@H](C)C[C@H]3O)=O)(O)C3C4)[C@H]4[C@]12C
195	19-O-methylpelorol	O=C1C=C[C@@]2(C)[C@](C[C@@H](O)[C@]3(C)[C@@H]2CC4=C3C=C(OC)C(C#C)=C4C)([H])C1(C)C
196	dasyscyphin A	[H][C@@]1(C(C)(C)CCC2)CC[C@](C)(C3=C4C(O)=CC(COC)=C3O)[C@H](C4)[C@]12C
197	dasyscyphin B	[H][C@@]1(C(C)(C)CCC2)CC[C@](C)([C@](C=C(C[OHmg])C3=O)(O)C4C3=O)[C@H](C4)[C@]12C
198	dasyscyphin C	O[C@H](C(C)(C)[C@]1([H])CC[C@@]2(C3=C4O)C)CC[C@]1(C)[C@H]2CC3=CC=C4C
199	dasyscyphin D	C[C@]1(C2=C3O)CC[C@@]4([H])[C@](C)(CO)CCC[C@]4(C)[C@H]1CC2=CC=C3C
200	dasyscyphin E	CC1(C)CCC[C@@]2(C)[C@@]1([H])CC[C@@]3(C)[C@@H]2CC4=C3C(O)=C(C([H])=O)C=C4O
201	dasyscyphin F	CC1(C)CCC[C@@]2(C)[C@@]1([H])CC[C@@]3(C)[C@@H]2CC4=C3C(C(COC)=CC4=O)=O
202	dasyscyphin G	CC1(C)CCC[C@@]2(C)[C@@]1([H])CC[C@@]3(C)[C@@H]2CC4=C3C(O)=C(OS(=O)(O[Na])=O)C(CO)=C4OS(=O)(O[Na])=O
203	akadisulfate A	CC1(C)CCC[C@@]2(C)[C@@]1([H])CC[C@]3(C)[C@@H]2CC4=C3C(C(OC)=O)=C(OC)C(O)=C4O
204	walsucochin A	O[C@H]1CC[C@@]2(C)[C@](CC([C@]3(C)[C@@H]2CC4=C3C=C(OC)C(C#C)=C4C)=O)([H])C1(C)C
205	walsucochin B	C[C@@]1(CO2)[C@H](OC(C(C)C)=O)C[C@H](O)[C@@]3(C)[C@@]1([H])[C@@H]2[C@@H](O)[C@]4(C)[C@@H]3CC5=C4C=C(OC)C(C6=COC=C6)=C5C
206	walsucochinoid C	CC1(C)C(C=C[C@@]2(C)[C@@]1([H])C([H])C([C@]3(C)C2CC4=C3C=C(OC)C(C5=COC=C5)=C4C)=O)=O
207	walsucochinoid D	CC1(C)C(C=C[C@@]2(C)[C@@]1([H])C([H])[C@@H](OC(C)=O)[C@]3(C)C2CC4=C3C=C(OC)C(C5=COC=C5)=C4C)=O
208	walsucochinoid E	CC1(C)C(C=C[C@@]2(C)[C@@]1([H])C([H])[C@@H](OC(C)=O)[C@]3(C)C2CC4=C3C=C(O)C(C5=COC=C5)=C4C)=O
209	walsucochinoid F	CC1(C)C(C=C[C@@]2(C)[C@@]1([H])[C@@H](O)[C@@H](OC(C)=O)[C@]3(C)C2CC4=C3C=C(OC)C(C5=COC=C5)=C4C)=O
210	walsucochinoid G	CC1(C)C(C=C[C@@]2(C)[C@@]1([H])[C@@H](O)[C@@H](OC(C)=O)[C@]3(C)C2CC4=C3C=C(O)C(C5=COC=C5)=C4C)=O
211	walsucochinoid H	CC1(C)[C@H](O)CC[C@@]2(C)[C@@]1([H])C[C@@H](O)[C@]3(C)C2CC4=C3C=C(OC)C(C5=COC=C5)=C4C
212	walsucochinoid I	CC1(C)[C@@H](O)CC[C@@]2(C)[C@@]1([H])C[C@@H](O)[C@]3(C)C2CC4=C3C=C(OC)C(C5=COC=C5)=C4C
213	walsucochinoid J	CC1(C)[C@@H](O)CC[C@@]2(C)[C@@]1([H])CC([C@]3(C)C2CC4=C3C=C(OC)C(C5=COC=C5)=C4C)=O
214	walsucochinoid K	CC1(C)C(CC[C@@]2(C)[C@@]1([H])[C@@H](O)[C@@H](OC(C)=O)[C@]3(C)C2CC4=C3C=C(OC)C(C5=COC=C5)=C4C)=O
215	walsucochinoid L	CC1(C)C(CC[C@@]2(C)[C@@]1([H])[C@@H](OC(C)=O)[C@@H](O)[C@]3(C)C2CC4=C3C=C(OC)C(C5=COC=C5)=C4C)=O
216	walsucochinoid M	CC1(C)C(CC[C@@]2(C)[C@@]1([H])[C@@H](O)[C@@H](OC(C)=O)[C@]3(C)C2CC4=C3C=C(O)C(C5=COC=C5)=C4C)=O
217	walsucochinoid N	C[C@@]1(CO2)[C@H](OC(C(CC)C)=O)C[C@H](O)[C@@]3(C)[C@@]1([H])[C@@H]2[C@@H](O)[C@]4(C)[C@]3([H])CC5=C4C=C(OC)C(C6=COC=C6)=C5C
218	cyclozonarone	CC1(C)CCC[C@@]2(C)[C@@]1([H])CCC3=CC(C(C(CO)=CC4=O)=O)=C4C=C32
219	(+)-(5S,10S)-4'-hydroxymethylcyclozonarone	CC1(C)CCC[C@@]2(C)[C@@]1([H])CCC3=C2CC(C4(O)C3)=C(O)C=C(CO)C4=O
220	phyllospinarone	[H]C([C@@]1(C)CCC[C@@]2(C)[C@@]1([H])CC(C3=C2C=C4C(C(C=CC4=O)=O)=C3)=O)=O
221	neopetrosiquinone A	OC[C@@]1(C)CCC[C@@]2(C)[C@@]1([H])C=CC3=C2C=C4C(C(C=CC4=O)=O)=C3
222	neopetrosiquinone B	[H][C@]12[C@](C)(CO)CCC[C@]1(C)[C@](C[C@]34[C@](C5)(O)[C@@H]6[C@](O6)(CO)[C@@H](O)[C@H]3O4)([H])C5=CC2
223	bis(sulfato)-cyclosiphonodictyol A	OC1=CC=C(O)C2=C1C[C@H]3[C@@](OC2)(C)CC[C@@]4([H])C(C)(C)CCC[C@@]43C
224	cyclosiphonodictyol A	CC1(C)CCCC2(C3([H])[H])[C@]3(CC(C(C(OC)=C4)=O)=C(O)C4=O)[C@@H](C)CC[C@@]21[H]
225	dictyoceratidaquinone	CC1(C)CCCC2(C3([H])[H])[C@]3(CC(C(C(OC)=C4)=O)=C(O)C4=O)[C@@H](C)CC[C@@]21[H]
